# Supplementary material for: Meat, Meat Products and Seafood as Sources of Energy and Nutrients in the Average Polish Diet
Source: MDPI journal article supplement (doi:10.3390/nu10101412), 2018-10-02
Supplement: s1 [file s1]

# Meat, Meat Products and Seafood as Sources of Energy and Nutrients in the Average Polish Diet

## Supplemental Tables

**Table S1.** Food group and product sources of energy contribution from meat, meat products, seafood in the average Polish diet (food groups and products contributing <0.1% not reported).

**Table S2.** Food group and product sources of protein contribution from meat, meat products, seafood in the average Polish diet.

**Table S3.** Food group and product sources of total fat contribution from meat, meat products, seafood in the average Polish diet (food groups and products contributing <0.1% not reported).

**Table S4.** Food group and product sources of SFA contribution from meat, meat products, seafood in the average Polish diet (food groups and products contributing <0.1% not reported).

**Table S5.** Food group and product sources of MUFA contribution from meat, meat products, seafood in the average Polish diet (food groups and products contributing <0.1% not reported).

**Table S6.** Food group and product sources of PUFA contribution from meat, meat products, seafood in the average Polish diet (food groups and products contributing <0.1% not reported).

**Table S7.** Food group and product sources of cholesterol contribution from meat, meat products, seafood in the average Polish diet.

**Table S8.** Food group and product sources of iron contribution from meat, meat products, seafood in the average Polish diet.

**Table S9.** Food group and product sources of zinc contribution from meat, meat products, seafood in the average Polish diet.

**Table S10.** Food group and product sources of sodium contribution from meat, meat products, seafood in the average Polish diet (food groups and products contributing <0.1% not reported).

**Table S11.** Food group and product sources of potassium contribution from meat, meat products, seafood in the average Polish diet (food groups and products contributing <0.1% not reported).

**Table S12.** Food group and product sources of potassium contribution from meat, meat products, seafood in the average Polish diet.

**Table S13.** Food group and product sources of calcium contribution from meat, meat products, seafood in the average Polish diet (food groups and products contributing <0.1% not reported).

**Table S14.** Food group and product sources of copper contribution from meat, meat products, seafood in the average Polish diet (food groups contributing <0.1% not reported).

**Table S15.** Food group and product sources of magnesium contribution from meat, meat products, seafood in the average Polish diet (food groups and products contributing <0.1% not reported).

**Table S16.** Food group and product sources of vitamin A contribution from meat, meat products, seafood in the average Polish diet (food groups and products contributing <0.1% not reported).

**Table S17.** Food group and product sources of vitamin D contribution from meat, meat products, seafood in the average Polish diet (food groups and products contributing <0.1% not reported).

**Table S18.** Food group and product sources of thiamin contribution from meat, meat products, seafood in the average Polish diet (food groups and products contributing <0.1% not reported).

**Table S19.** Food group and product sources of riboflavin contribution from meat, meat products, seafood in the average Polish diet (food groups and products contributing <0.1% not reported).

**Table S20.** Food group and product sources of niacin contribution from meat, meat products, seafood in the average Polish diet.

**Table S21.** Food group and product sources of vitamin B6 contribution from meat, meat products, seafood in the average Polish diet (food groups and products contributing <0.1% not reported).

**Table S22.** Food group and product sources of vitamin B12 contribution from meat, meat products, seafood in the average Polish diet.

**Table S23.** Food group and product sources of vitamin E contribution from meat, meat products, seafood in the average Polish diet (food groups and products contributing <0.1% not reported).

**Table S1.** Food group and product sources of energy (kcal) contribution from meat, meat products, and seafood in the average Polish diet.

| <b>Food Group<br/>Food Product <sup>1/</sup></b> | <b>Rank</b> | <b>% of Energy<br/>Contribution</b> | <b>Cumulative % of<br/>Energy Contribution</b> |
|--------------------------------------------------|-------------|-------------------------------------|------------------------------------------------|
| <b>Food Group</b>                                |             |                                     |                                                |
| meat products                                    | 1           | 8.29                                | 8.29                                           |
| red meat                                         | 2           | 4.93                                | 13.22                                          |
| poultry                                          | 3           | 3.63                                | 16.85                                          |
| other meat                                       | 4           | 0.80                                | 17.66                                          |
| processed seafood                                | 5           | 0.61                                | 18.26                                          |
| fishes                                           | 6           | 0.23                                | 18.49                                          |
| shellfish                                        | 7           | 0.01                                | 18.50                                          |
| <b>Food Product</b>                              |             |                                     |                                                |
| processed red meat products                      | 1           | 6.82                                | 6.82                                           |
| pork                                             | 2           | 4.73                                | 11.55                                          |
| chicken                                          | 3           | 3.20                                | 14.76                                          |
| other meat products                              | 4           | 0.99                                | 15.75                                          |
| liver, organ meat                                | 5           | 0.65                                | 16.40                                          |
| processed poultry products                       | 6           | 0.47                                | 16.88                                          |
| poultry excluding chicken                        | 7           | 0.43                                | 17.30                                          |
| other fish and shellfish products                | 8           | 0.36                                | 17.66                                          |
| dried, smoked and salted seafood                 | 9           | 0.25                                | 17.91                                          |
| fresh, chilled or frozen fish                    | 10          | 0.23                                | 18.14                                          |
| beef                                             | 11          | 0.19                                | 18.33                                          |
| minced meat                                      | 12          | 0.13                                | 18.46                                          |

<sup>1/</sup> food groups or products contributed at least 0.1% of energy.

**Table S2.** Food group and product sources of protein contribution from meat, meat products, and seafood in the average Polish diet.

| <b>Food Group<br/>Food Product</b> | <b>Rank</b> | <b>% of Protein<br/>Contribution</b> | <b>Cumulative % of<br/>Protein<br/>Contribution</b> |
|------------------------------------|-------------|--------------------------------------|-----------------------------------------------------|
| <b>Food Group</b>                  |             |                                      |                                                     |
| meat products                      | 1           | 17.44                                | 17.44                                               |
| red meat                           | 2           | 9.91                                 | 27.35                                               |
| poultry                            | 3           | 9.71                                 | 37.06                                               |
| other meat                         | 4           | 1.89                                 | 38.95                                               |
| processed seafood                  | 5           | 1.56                                 | 40.50                                               |
| fishes                             | 6           | 0.99                                 | 41.49                                               |
| shellfish                          | 7           | 0.02                                 | 41.52                                               |
| <b>Food Products</b>               |             |                                      |                                                     |
| processed red meat products        | 1           | 14.00                                | 14.00                                               |
| pork                               | 2           | 9.18                                 | 23.18                                               |
| chicken                            | 3           | 8.48                                 | 31.66                                               |
| other meat products                | 4           | 1.98                                 | 33.64                                               |
| liver, organ meat                  | 5           | 1.51                                 | 35.15                                               |
| processed poultry products         | 6           | 1.46                                 | 36.61                                               |
| poultry excluding chicken          | 7           | 1.22                                 | 37.84                                               |
| fresh, chilled or frozen fish      | 8           | 0.99                                 | 38.82                                               |
| other fish and shellfish products  | 9           | 0.85                                 | 39.67                                               |
| dried, smoked and salted seafood   | 10          | 0.71                                 | 40.38                                               |
| beef                               | 11          | 0.68                                 | 41.06                                               |
| minced meat                        | 12          | 0.30                                 | 41.36                                               |
| other meat                         | 13          | 0.09                                 | 41.44                                               |
| veal                               | 14          | 0.04                                 | 41.49                                               |
| fresh, chilled or frozen shellfish | 15          | 0.02                                 | 41.51                                               |
| sheep, goat                        | 16          | 0.01                                 | 41.52                                               |

**Table S3.** Food group and product sources of total fat contribution from meat, meat products, and seafood in the average Polish diet.

| <b>Food Group<br/>Food Product <sup>1/</sup></b> | <b>Rank</b> | <b>% of Total<br/>Fat<br/>Contribution</b> | <b>Cumulative % of<br/>Total Fat<br/>Contribution</b> |
|--------------------------------------------------|-------------|--------------------------------------------|-------------------------------------------------------|
| <b>Food Group</b>                                |             |                                            |                                                       |
| meat products                                    | 1           | 14.69                                      | 14.69                                                 |
| red meat                                         | 2           | 8.94                                       | 23.63                                                 |
| poultry                                          | 3           | 5.87                                       | 29.51                                                 |
| other meat                                       | 4           | 1.32                                       | 30.83                                                 |
| processed seafood                                | 5           | 0.95                                       | 31.78                                                 |
| fishes                                           | 6           | 0.23                                       | 32.01                                                 |
| <b>Food Product</b>                              |             |                                            |                                                       |
| processed red meat products                      | 1           | 12.50                                      | 12.50                                                 |
| pork                                             | 2           | 8.70                                       | 21.20                                                 |
| chicken                                          | 3           | 5.22                                       | 26.42                                                 |
| other meat products                              | 4           | 1.52                                       | 27.94                                                 |
| liver, organ meat                                | 5           | 1.06                                       | 29.02                                                 |
| processed poultry products                       | 6           | 0.67                                       | 29.69                                                 |
| poultry excluding chicken                        | 7           | 0.65                                       | 30.34                                                 |
| other fish and shellfish products                | 8           | 0.57                                       | 30.91                                                 |
| dried, smoked and salted seafood                 | 9           | 0.38                                       | 31.29                                                 |
| minced meat                                      | 10          | 0.23                                       | 31.52                                                 |
| fresh, chilled or frozen fish                    | 11          | 0.23                                       | 31.75                                                 |
| beef                                             | 12          | 0.22                                       | 31.97                                                 |
| other meat                                       | 13          | 0.03                                       | 32.00                                                 |
| sheep, goat                                      | 14          | 0.01                                       | 32.01                                                 |

<sup>1/</sup> food groups or products contributed at least 0.1% of total fat.

**Table S4.** Food group and product sources of SFA contribution from meat, meat products, and seafood in the average Polish diet.

| <b>Food Group<br/>Food Product <sup>1/</sup></b> | <b>Rank</b> | <b>% of SFA<br/>Contribution</b> | <b>Cumulative % of SFA<br/>Contribution</b> |
|--------------------------------------------------|-------------|----------------------------------|---------------------------------------------|
| <b>Food Group</b>                                |             |                                  |                                             |
| meat products                                    | 1           | 13.99                            | 13.99                                       |
| meat                                             | 2           | 9.69                             | 23.68                                       |
| poultry                                          | 3           | 4.68                             | 28.36                                       |
| other meat                                       | 4           | 1.27                             | 29.63                                       |
| processed seafood                                | 5           | 0.52                             | 30.15                                       |
| fishes                                           | 6           | 0.14                             | 30.29                                       |
| <b>Food Product</b>                              |             |                                  |                                             |
| processed red meat products                      | 1           | 12.14                            | 12.14                                       |
| pork                                             | 2           | 9.38                             | 21.52                                       |
| chicken                                          | 3           | 4.18                             | 25.70                                       |
| other meat products                              | 4           | 1.28                             | 26.98                                       |
| liver, organ meat                                | 5           | 0.99                             | 27.97                                       |
| processed poultry products                       | 6           | 0.57                             | 28.54                                       |
| poultry excluding chicken                        | 7           | 0.50                             | 29.04                                       |
| beef                                             | 8           | 0.29                             | 29.33                                       |
| other fish and shellfish products                | 9           | 0.28                             | 29.61                                       |
| minced meat                                      | 10          | 0.26                             | 29.86                                       |
| dried, smoked and salted seafood                 | 11          | 0.24                             | 30.10                                       |
| fresh, chilled or frozen fish                    | 12          | 0.14                             | 30.24                                       |
| other meat                                       | 13          | 0.03                             | 30.27                                       |
| sheep, goat                                      | 14          | 0.01                             | 30.28                                       |

<sup>1/</sup> food groups or products contributed at least 0.1% of SFA.

**Table S5.** Food group and product sources of MUFA contribution from meat, meat products, and seafood in the average Polish diet.

| <b>Food Group<br/>Food Product <sup>1/</sup></b> | <b>Rank</b> | <b>% of MUFA<br/>Contribution</b> | <b>Cumulative % of<br/>MUFA Contribution</b> |
|--------------------------------------------------|-------------|-----------------------------------|----------------------------------------------|
| <b>Food Group</b>                                |             |                                   |                                              |
| meat products                                    | 1           | 17.96                             | 17.96                                        |
| red meat                                         | 2           | 10.18                             | 28.15                                        |
| poultry                                          | 3           | 6.66                              | 34.81                                        |
| other meat                                       | 4           | 1.48                              | 36.29                                        |
| processed seafood                                | 5           | 1.11                              | 37.40                                        |
| fishes                                           | 6           | 0.23                              | 37.63                                        |
| <b>Food Product</b>                              |             |                                   |                                              |
| processed red meat products                      | 1           | 15.31                             | 15.31                                        |
| pork                                             | 2           | 9.92                              | 25.23                                        |
| chicken                                          | 3           | 5.87                              | 31.10                                        |
| other meat products                              | 4           | 1.88                              | 32.97                                        |
| liver, organ meat                                | 5           | 1.19                              | 34.16                                        |
| poultry excluding chicken                        | 6           | 0.79                              | 34.96                                        |
| processed poultry products                       | 7           | 0.77                              | 35.73                                        |
| other fish and shellfish products                | 8           | 0.65                              | 36.38                                        |
| dried, smoked and salted seafood                 | 9           | 0.45                              | 36.83                                        |
| minced meat                                      | 10          | 0.28                              | 37.11                                        |
| beef                                             | 11          | 0.25                              | 37.37                                        |
| fresh, chilled or frozen fish                    | 12          | 0.23                              | 37.60                                        |
| other meat                                       | 13          | 0.01                              | 37.61                                        |
| sheep, goat                                      | 14          | 0.01                              | 37.62                                        |
| veal                                             | 15          | 0.01                              | 37.63                                        |

<sup>1/</sup> food groups or products contributed at least 0.1% of MUFA.

**Table S6.** Food group and product sources of PUFA contribution from meat, meat products, and seafood in the average Polish diet.

| <b>Food Group<br/>Food Product <sup>1/</sup></b> | <b>Rank</b> | <b>% of PUFA<br/>Contribution</b> | <b>Cumulative % of<br/>PUFA Contribution</b> |
|--------------------------------------------------|-------------|-----------------------------------|----------------------------------------------|
| <b>Food Group</b>                                |             |                                   |                                              |
| meat products                                    | 1           | 7.63                              | 7.63                                         |
| poultry                                          | 2           | 6.14                              | 13.77                                        |
| red meat                                         | 3           | 4.87                              | 18.63                                        |
| processed seafood                                | 4           | 1.45                              | 20.09                                        |
| other meat                                       | 5           | 1.15                              | 21.23                                        |
| fishes                                           | 6           | 0.36                              | 21.59                                        |
| shellfish                                        | 7           | 0.01                              | 21.60                                        |
| <b>Food Product</b>                              |             |                                   |                                              |
| processed red meat products                      | 1           | 5.80                              | 5.80                                         |
| chicken                                          | 2           | 5.30                              | 11.10                                        |
| pork                                             | 3           | 4.81                              | 15.91                                        |
| other meat products                              | 4           | 1.20                              | 17.12                                        |
| liver, organ meat                                | 5           | 1.00                              | 18.11                                        |
| other fish and shellfish products                | 6           | 0.98                              | 19.09                                        |
| poultry excluding chicken                        | 7           | 0.84                              | 19.93                                        |
| processed poultry products                       | 8           | 0.63                              | 20.56                                        |
| dried, smoked and salted seafood                 | 9           | 0.47                              | 21.03                                        |
| fresh, chilled or frozen fish                    | 10          | 0.36                              | 21.38                                        |
| minced meat                                      | 11          | 0.11                              | 21.49                                        |
| beef                                             | 12          | 0.05                              | 21.54                                        |
| other meat                                       | 13          | 0.05                              | 21.58                                        |
| fresh, chilled or frozen shellfish               | 14          | 0.01                              | 21.59                                        |

<sup>1/</sup> food groups or products contributed at least 0.1% of PUFA.

**Table S7.** Food group and product sources of cholesterol contribution from meat, meat products, and seafood in the average Polish diet.

| <b>Food Group<br/>Food Product <sup>1/</sup></b> | <b>Rank</b> | <b>% of<br/>Cholesterol<br/>Contribution</b> | <b>Cumulative % of<br/>Cholesterol<br/>Contribution</b> |
|--------------------------------------------------|-------------|----------------------------------------------|---------------------------------------------------------|
| <b>Food Group</b>                                |             |                                              |                                                         |
| meat products                                    | 1           | 16.27                                        | 16.27                                                   |
| poultry                                          | 2           | 11.77                                        | 28.04                                                   |
| red meat                                         | 3           | 8.29                                         | 36.33                                                   |
| other meat                                       | 4           | 5.99                                         | 42.32                                                   |
| processed seafood                                | 5           | 1.64                                         | 43.95                                                   |
| fishes                                           | 6           | 0.90                                         | 44.86                                                   |
| shellfish                                        | 7           | 0.04                                         | 44.90                                                   |
| <b>Food Product</b>                              |             |                                              |                                                         |
| processed red meat products                      | 1           | 12.33                                        | 12.33                                                   |
| chicken                                          | 2           | 10.41                                        | 22.73                                                   |
| pork                                             | 3           | 7.66                                         | 30.40                                                   |
| liver, organ meat                                | 4           | 5.66                                         | 36.06                                                   |
| other meat products                              | 5           | 2.35                                         | 38.41                                                   |
| processed poultry products                       | 6           | 1.59                                         | 40.00                                                   |
| poultry excluding chicken                        | 7           | 1.37                                         | 41.37                                                   |
| other fish and shellfish products                | 8           | 0.98                                         | 42.35                                                   |
| fresh, chilled or frozen fish                    | 9           | 0.90                                         | 43.25                                                   |
| dried, smoked and salted seafood                 | 10          | 0.66                                         | 43.91                                                   |
| beef                                             | 11          | 0.58                                         | 44.49                                                   |
| minced meat                                      | 12          | 0.26                                         | 44.74                                                   |
| other meat                                       | 13          | 0.07                                         | 44.81                                                   |
| fresh, chilled or frozen shellfish               | 14          | 0.04                                         | 44.85                                                   |
| veal                                             | 15          | 0.04                                         | 44.89                                                   |
| sheep, goat                                      | 16          | 0.01                                         | 44.90                                                   |



**Table S8.** Food group and product sources of iron contribution from meat, meat products, and seafood in the average Polish diet.

| <b>Food Group</b><br><b>Food Product</b> | <b>Rank</b> | <b>% of Iron</b><br><b>Contribution</b> | <b>Cumulative % of Iron</b><br><b>Contribution</b> |
|------------------------------------------|-------------|-----------------------------------------|----------------------------------------------------|
| <b>Food Group</b>                        |             |                                         |                                                    |
| meat products                            | 3           | 10.43                                   | 10.43                                              |
| red meat                                 | 2           | 4.66                                    | 15.10                                              |
| poultry                                  | 5           | 4.33                                    | 19.43                                              |
| other meat                               | 4           | 4.25                                    | 23.68                                              |
| processed seafood                        | 6           | 0.81                                    | 24.49                                              |
| fishes                                   | 1           | 0.27                                    | 24.77                                              |
| shellfish                                | 7           | 0.04                                    | 24.80                                              |
| <b>Food Product</b>                      |             |                                         |                                                    |
| processed red meat products              | 1           | 7.72                                    | 7.72                                               |
| liver, organ meat                        | 2           | 3.99                                    | 11.71                                              |
| pork                                     | 3           | 3.95                                    | 15.67                                              |
| chicken                                  | 4           | 3.77                                    | 19.43                                              |
| other meat products                      | 5           | 1.90                                    | 21.33                                              |
| processed poultry products               | 6           | 0.82                                    | 22.15                                              |
| beef                                     | 7           | 0.67                                    | 22.82                                              |
| poultry excluding chicken                | 8           | 0.56                                    | 23.38                                              |
| other fish and shellfish products        | 9           | 0.55                                    | 23.93                                              |
| fresh, chilled or frozen fish            | 10          | 0.27                                    | 24.20                                              |
| dried, smoked and salted seafood         | 11          | 0.26                                    | 24.46                                              |
| minced meat                              | 12          | 0.17                                    | 24.64                                              |
| other meat                               | 13          | 0.09                                    | 24.72                                              |
| fresh, chilled or frozen shellfish       | 14          | 0.04                                    | 24.76                                              |
| veal                                     | 15          | 0.03                                    | 24.79                                              |
| sheep, goat                              | 16          | 0.01                                    | 24.80                                              |

**Table S9.** Food group and product sources of zinc contribution from meat, meat products, and seafood in the average Polish diet.

| <b>Food Group<br/>Food Product</b> | <b>Rank</b> | <b>% of Zinc<br/>Contribution</b> | <b>Cumulative % of Zinc<br/>Contribution</b> |
|------------------------------------|-------------|-----------------------------------|----------------------------------------------|
| <b>Food Group</b>                  |             |                                   |                                              |
| meat products                      | 1           | 15.49                             | 15.49                                        |
| red meat                           | 2           | 9.40                              | 24.90                                        |
| poultry                            | 3           | 5.56                              | 30.45                                        |
| other meat                         | 4           | 2.30                              | 32.75                                        |
| processed seafood                  | 5           | 0.67                              | 33.43                                        |
| fishes                             | 6           | 0.28                              | 33.71                                        |
| shellfish                          | 7           | 0.09                              | 33.80                                        |
| <b>Food Product</b>                |             |                                   |                                              |
| processed red meat products        | 1           | 12.90                             | 12.90                                        |
| pork                               | 2           | 8.48                              | 21.38                                        |
| chicken                            | 3           | 4.46                              | 25.84                                        |
| liver, organ meat                  | 4           | 1.92                              | 27.76                                        |
| other meat products                | 5           | 1.73                              | 29.49                                        |
| poultry excluding chicken          | 6           | 1.10                              | 30.58                                        |
| beef                               | 7           | 0.88                              | 31.46                                        |
| processed poultry products         | 8           | 0.86                              | 32.32                                        |
| other fish and shellfish products  | 9           | 0.48                              | 32.80                                        |
| minced meat                        | 10          | 0.30                              | 33.10                                        |
| fresh, chilled or frozen fish      | 11          | 0.28                              | 33.39                                        |
| dried, smoked and salted seafood   | 12          | 0.20                              | 33.58                                        |
| fresh, chilled or frozen shellfish | 13          | 0.09                              | 33.68                                        |
| other meat                         | 14          | 0.08                              | 33.75                                        |
| veal                               | 15          | 0.04                              | 33.79                                        |
| sheep, goat                        | 16          | 0.01                              | 33.80                                        |

**Table S10.** Food group and product sources of sodium contribution from meat, meat products, and seafood in the average Polish diet.

| <b>Food Group<br/>Food Product <sup>1/</sup></b> | <b>Rank</b> | <b>% of Sodium<br/>Contribution</b> | <b>Cumulative % of<br/>Sodium Contribution</b> |
|--------------------------------------------------|-------------|-------------------------------------|------------------------------------------------|
| <b>Food Group</b>                                |             |                                     |                                                |
| meat products                                    | 1           | 15.15                               | 15.15                                          |
| processed seafood                                | 2           | 2.70                                | 17.84                                          |
| poultry                                          | 3           | 0.84                                | 18.68                                          |
| other meat                                       | 4           | 0.75                                | 19.43                                          |
| red meat                                         | 5           | 0.74                                | 20.17                                          |
| fishes                                           | 6           | 0.08                                | 20.25                                          |
| shellfish                                        | 7           | 0.01                                | 20.26                                          |
| <b>Food Product</b>                              |             |                                     |                                                |
| processed red meat products                      | 1           | 12.44                               | 12.44                                          |
| dried, smoked and salted seafood                 | 2           | 1.97                                | 14.41                                          |
| processed poultry products                       | 3           | 1.36                                | 15.77                                          |
| other meat products                              | 4           | 1.35                                | 17.12                                          |
| chicken                                          | 5           | 0.73                                | 17.85                                          |
| liver, organ meat                                | 6           | 0.73                                | 18.58                                          |
| other fish and shellfish products                | 7           | 0.72                                | 19.30                                          |
| pork                                             | 8           | 0.69                                | 19.98                                          |
| poultry excluding chicken                        | 9           | 0.12                                | 20.10                                          |
| fresh, chilled or frozen fish                    | 10          | 0.08                                | 20.18                                          |
| beef                                             | 11          | 0.04                                | 20.22                                          |
| minced meat                                      | 12          | 0.02                                | 20.24                                          |
| other meat                                       | 13          | 0.01                                | 20.25                                          |

<sup>1/</sup> food groups or products contributed at least 0.1% of sodium.

**Table S11.** Food group and product sources of potassium contribution from meat, meat products, and seafood in the average Polish diet.

| <b>Food Group<br/>Food Product <sup>1/</sup></b> | <b>Rank</b> | <b>% of<br/>Potassium<br/>Contribution</b> | <b>Cumulative % of<br/>Potassium<br/>Contribution</b> |
|--------------------------------------------------|-------------|--------------------------------------------|-------------------------------------------------------|
| <b>Food Group</b>                                |             |                                            |                                                       |
| meat products                                    | 1           | 6.68                                       | 6.68                                                  |
| red meat                                         | 2           | 5.17                                       | 11.86                                                 |
| poultry                                          | 3           | 5.03                                       | 16.88                                                 |
| other meat                                       | 4           | 0.81                                       | 17.69                                                 |
| processed seafood                                | 5           | 0.80                                       | 18.49                                                 |
| fishes                                           | 6           | 0.58                                       | 19.08                                                 |
| shellfish                                        | 7           | 0.01                                       | 19.09                                                 |
| <b>Food Product</b>                              |             |                                            |                                                       |
| processed red meat products                      | 1           | 4.88                                       | 4.88                                                  |
| pork                                             | 2           | 4.78                                       | 9.66                                                  |
| chicken                                          | 3           | 4.27                                       | 13.93                                                 |
| other meat products                              | 4           | 0.95                                       | 14.87                                                 |
| processed poultry products                       | 5           | 0.85                                       | 15.72                                                 |
| poultry excluding chicken                        | 6           | 0.76                                       | 16.49                                                 |
| liver, organ meat                                | 7           | 0.61                                       | 17.10                                                 |
| fresh, chilled or frozen fish                    | 8           | 0.58                                       | 17.68                                                 |
| other fish and shellfish products                | 9           | 0.50                                       | 18.18                                                 |
| beef                                             | 10          | 0.37                                       | 18.55                                                 |
| dried, smoked and salted seafood                 | 11          | 0.30                                       | 18.85                                                 |
| minced meat                                      | 12          | 0.15                                       | 19.00                                                 |
| other meat                                       | 13          | 0.05                                       | 19.05                                                 |
| veal                                             | 14          | 0.02                                       | 19.07                                                 |
| fresh, chilled or frozen shellfish               | 15          | 0.01                                       | 19.08                                                 |

<sup>1/</sup> food groups or products contributed at least 0.1% of potassium.

**Table S12.** Food group and product sources of phosphorus contribution from meat, meat products, and seafood in the average Polish diet.

| <b>Food Group<br/>Food Product <sup>1/</sup></b> | <b>Rank</b> | <b>% of<br/>Phosphorus<br/>Contribution</b> | <b>Cumulative % of<br/>Phosphorus<br/>Contribution</b> |
|--------------------------------------------------|-------------|---------------------------------------------|--------------------------------------------------------|
| <b>Food Group</b>                                |             |                                             |                                                        |
| meat products                                    | 1           | 8.96                                        | 8.96                                                   |
| poultry                                          | 2           | 6.89                                        | 15.86                                                  |
| red meat                                         | 3           | 5.44                                        | 21.30                                                  |
| processed seafood                                | 4           | 1.49                                        | 22.79                                                  |
| other meat                                       | 5           | 1.35                                        | 24.14                                                  |
| fishes                                           | 6           | 0.77                                        | 24.91                                                  |
| shellfish                                        | 7           | 0.02                                        | 24.93                                                  |
| <b>Food Product</b>                              |             |                                             |                                                        |
| processed red meat products                      | 1           | 6.56                                        | 6.56                                                   |
| chicken                                          | 2           | 5.91                                        | 12.46                                                  |
| pork                                             | 3           | 4.96                                        | 17.42                                                  |
| other meat products                              | 4           | 1.24                                        | 18.66                                                  |
| processed poultry products                       | 5           | 1.16                                        | 19.82                                                  |
| liver, organ meat                                | 6           | 1.13                                        | 20.96                                                  |
| poultry excluding chicken                        | 7           | 0.99                                        | 21.95                                                  |
| other fish and shellfish products                | 8           | 0.83                                        | 22.78                                                  |
| fresh, chilled or frozen fish                    | 9           | 0.77                                        | 23.55                                                  |
| dried, smoked and salted seafood                 | 10          | 0.66                                        | 24.21                                                  |
| beef                                             | 11          | 0.45                                        | 24.66                                                  |
| minced meat                                      | 12          | 0.16                                        | 24.83                                                  |
| other meat                                       | 13          | 0.05                                        | 24.88                                                  |
| veal                                             | 14          | 0.03                                        | 24.90                                                  |
| fresh, chilled or frozen shellfish               | 15          | 0.02                                        | 24.92                                                  |
| sheep, goat                                      | 16          | 0.01                                        | 24.93                                                  |

**Table S13.** Food group and product sources of calcium contribution from meat, meat products, and seafood in the average Polish diet.

| <b>Food Group<br/>Food Product <sup>1/</sup></b> | <b>Rank</b> | <b>% of Calcium<br/>Contribution</b> | <b>Cumulative % of<br/>Calcium Contribution</b> |
|--------------------------------------------------|-------------|--------------------------------------|-------------------------------------------------|
| <b>Food Group</b>                                |             |                                      |                                                 |
| meat products                                    | 1           | 1.71                                 | 1.71                                            |
| red meat                                         | 2           | 0.94                                 | 2.64                                            |
| poultry                                          | 3           | 0.75                                 | 3.40                                            |
| processed seafood                                | 4           | 0.68                                 | 4.07                                            |
| other meat                                       | 5           | 0.36                                 | 4.44                                            |
| fishes                                           | 6           | 0.14                                 | 4.57                                            |
| shellfish                                        | 7           | 0.01                                 | 4.58                                            |
| <b>Food Product</b>                              |             |                                      |                                                 |
| processed red meat products                      | 1           | 1.04                                 | 1.04                                            |
| pork                                             | 2           | 0.88                                 | 1.93                                            |
| chicken                                          | 3           | 0.69                                 | 2.62                                            |
| other fish and shellfish products                | 4           | 0.53                                 | 3.15                                            |
| other meat products                              | 5           | 0.44                                 | 3.59                                            |
| liver, organ meat                                | 6           | 0.33                                 | 3.92                                            |
| processed poultry products                       | 7           | 0.23                                 | 4.15                                            |
| dried, smoked and salted seafood                 | 8           | 0.15                                 | 4.29                                            |
| fresh, chilled or frozen fish                    | 9           | 0.14                                 | 4.43                                            |
| poultry excluding chicken                        | 10          | 0.06                                 | 4.49                                            |
| beef                                             | 11          | 0.05                                 | 4.54                                            |
| minced meat                                      | 12          | 0.02                                 | 4.56                                            |
| other meat                                       | 13          | 0.01                                 | 4.57                                            |
| fresh, chilled or frozen shellfish               | 14          | 0.01                                 | 4.58                                            |

<sup>1/</sup> food groups or products contributed at least 0.1% of calcium.

**Table S14.** Food group and product sources of copper contribution from meat, meat products, and seafood in the average Polish diet.

| <b>Food Group<br/>Food Product <sup>1/</sup></b> | <b>Rank</b> | <b>% of Copper<br/>Contribution</b> | <b>Cumulative % of<br/>Copper Contribution</b> |
|--------------------------------------------------|-------------|-------------------------------------|------------------------------------------------|
| <b>Food Group</b>                                |             |                                     |                                                |
| meat products                                    | 1           | 4.72                                | 4.72                                           |
| other meat                                       | 2           | 3.13                                | 7.85                                           |
| poultry                                          | 3           | 2.32                                | 10.17                                          |
| red meat                                         | 4           | 2.22                                | 12.39                                          |
| processed seafood                                | 5           | 0.89                                | 13.28                                          |
| fishes                                           | 6           | 0.31                                | 13.58                                          |
| shellfish                                        | 7           | 0.08                                | 13.67                                          |
| <b>Food Product</b>                              |             |                                     |                                                |
| processed red meat products                      | 1           | 3.29                                | 3.29                                           |
| liver, organ meat                                | 2           | 3.02                                | 6.31                                           |
| pork                                             | 3           | 2.00                                | 8.31                                           |
| chicken                                          | 4           | 1.99                                | 10.30                                          |
| other meat products                              | 5           | 0.93                                | 11.23                                          |
| other fish and shellfish products                | 6           | 0.52                                | 11.75                                          |
| processed poultry products                       | 7           | 0.50                                | 12.25                                          |
| dried, smoked and salted seafood                 | 8           | 0.37                                | 12.62                                          |
| poultry excluding chicken                        | 9           | 0.33                                | 12.95                                          |
| fresh, chilled or frozen fish                    | 10          | 0.31                                | 13.25                                          |
| beef                                             | 11          | 0.18                                | 13.44                                          |
| fresh, chilled or frozen shellfish               | 12          | 0.08                                | 13.52                                          |
| minced meat                                      | 13          | 0.07                                | 13.59                                          |
| other meat                                       | 14          | 0.04                                | 13.63                                          |
| veal                                             | 15          | 0.03                                | 13.66                                          |

<sup>1/</sup> food groups or products contributed at least 0.1% of copper contribution.

**Table S15.** Food group and product sources of magnesium contribution from meat, meat products, and seafood in the average Polish diet.

| <b>Food Group<br/>Food Product <sup>1/</sup></b> | <b>Rank</b> | <b>% of<br/>Magnesium<br/>Contribution</b> | <b>Cumulative % of<br/>Magnesium<br/>Contribution</b> |
|--------------------------------------------------|-------------|--------------------------------------------|-------------------------------------------------------|
| <b>Food Group</b>                                |             |                                            |                                                       |
| meat products                                    | 1           | 4.87                                       | 4.87                                                  |
| poultry                                          | 2           | 3.69                                       | 8.56                                                  |
| red meat                                         | 3           | 2.76                                       | 11.32                                                 |
| processed seafood                                | 4           | 0.80                                       | 12.12                                                 |
| other meat                                       | 5           | 0.54                                       | 12.66                                                 |
| fishes                                           | 6           | 0.46                                       | 13.12                                                 |
| shellfish                                        | 7           | 0.01                                       | 13.14                                                 |
| <b>Food Product</b>                              |             |                                            |                                                       |
| processed red meat products                      | 1           | 3.32                                       | 3.32                                                  |
| chicken                                          | 2           | 3.13                                       | 6.45                                                  |
| pork                                             | 3           | 2.50                                       | 8.95                                                  |
| processed poultry products                       | 4           | 0.80                                       | 9.75                                                  |
| other meat products                              | 5           | 0.75                                       | 10.50                                                 |
| poultry excluding chicken                        | 6           | 0.56                                       | 11.06                                                 |
| other fish and shellfish products                | 7           | 0.48                                       | 11.54                                                 |
| fresh, chilled or frozen fish                    | 8           | 0.46                                       | 12.00                                                 |
| liver, organ meat                                | 9           | 0.43                                       | 12.43                                                 |
| dried, smoked and salted seafood                 | 10          | 0.32                                       | 12.75                                                 |
| beef                                             | 11          | 0.24                                       | 12.99                                                 |
| minced meat                                      | 12          | 0.08                                       | 13.08                                                 |
| other meat                                       | 13          | 0.03                                       | 13.11                                                 |
| fresh, chilled or frozen shellfish               | 14          | 0.01                                       | 13.12                                                 |
| veal                                             | 15          | 0.01                                       | 13.13                                                 |

<sup>1/</sup> food groups or products contributed at least 0.1% of magnesium.



**Table S16.** Food group and product sources of vitamin A contribution from meat, meat products, and seafood in the average Polish diet.

| <b>Food Group<br/>Food Product <sup>1/</sup></b> | <b>Rank</b> | <b>% of Vitamin A<br/>Contribution</b> | <b>Cumulative % of<br/>Vitamin A<br/>Contribution</b> |
|--------------------------------------------------|-------------|----------------------------------------|-------------------------------------------------------|
| <b>Food Group</b>                                |             |                                        |                                                       |
| other meat                                       | 1           | 17.30                                  | 17.30                                                 |
| meat products                                    | 2           | 3.26                                   | 20.55                                                 |
| poultry                                          | 3           | 0.82                                   | 21.37                                                 |
| processed seafood                                | 4           | 0.73                                   | 22.10                                                 |
| fishes                                           | 5           | 0.38                                   | 22.47                                                 |
| red meat                                         | 6           | 0.04                                   | 22.51                                                 |
| shellfish                                        | 7           | 0.01                                   | 22.52                                                 |
| <b>Food Product</b>                              |             |                                        |                                                       |
| liver, organ meat                                | 1           | 17.29                                  | 17.29                                                 |
| other meat products                              | 2           | 3.01                                   | 20.30                                                 |
| chicken                                          | 3           | 0.68                                   | 20.97                                                 |
| other fish and shellfish products                | 4           | 0.46                                   | 21.43                                                 |
| fresh, chilled or frozen fish                    | 5           | 0.38                                   | 21.81                                                 |
| dried, smoked and salted seafood                 | 6           | 0.27                                   | 22.07                                                 |
| processed red meat products                      | 7           | 0.15                                   | 22.23                                                 |
| poultry excluding chicken                        | 8           | 0.14                                   | 22.37                                                 |
| processed poultry products                       | 9           | 0.10                                   | 22.47                                                 |
| beef                                             | 10          | 0.03                                   | 22.50                                                 |
| fresh, chilled or frozen shellfish               | 11          | 0.01                                   | 22.51                                                 |

<sup>1/</sup> food groups or products contributed at least 0.1% of vitamin A.

**Table S17.** Food group and product sources of vitamin D contribution from meat, meat products, and seafood in the average Polish diet.

| <b>Food Group<br/>Food Product <sup>1/</sup></b> | <b>Rank</b> | <b>% of Vitamin D<br/>Contribution</b> | <b>Cumulative % of<br/>Vitamin D<br/>Contribution</b> |
|--------------------------------------------------|-------------|----------------------------------------|-------------------------------------------------------|
| <b>Food Group</b>                                |             |                                        |                                                       |
| processed seafood                                | 1           | 10.96                                  | 10.96                                                 |
| meat products                                    | 2           | 8.88                                   | 19.85                                                 |
| poultry                                          | 3           | 8.74                                   | 28.59                                                 |
| red meat                                         | 4           | 6.82                                   | 35.41                                                 |
| fishes                                           | 5           | 5.07                                   | 40.48                                                 |
| other meat                                       | 6           | 0.95                                   | 41.43                                                 |
| <b>Food Product</b>                              |             |                                        |                                                       |
| chicken                                          | 1           | 7.96                                   | 7.96                                                  |
| processed red meat products                      | 2           | 7.40                                   | 15.36                                                 |
| pork                                             | 3           | 6.48                                   | 21.84                                                 |
| dried, smoked and salted seafood                 | 4           | 5.78                                   | 27.61                                                 |
| other fish and shellfish products                | 5           | 5.19                                   | 32.80                                                 |
| fresh, chilled or frozen fish                    | 6           | 5.07                                   | 37.87                                                 |
| other meat products                              | 7           | 1.24                                   | 39.11                                                 |
| poultry excluding chicken                        | 8           | 0.78                                   | 39.89                                                 |
| liver, organ meat                                | 9           | 0.72                                   | 40.61                                                 |
| beef                                             | 10          | 0.33                                   | 40.95                                                 |
| processed poultry products                       | 11          | 0.24                                   | 41.19                                                 |
| minced meat                                      | 12          | 0.20                                   | 41.38                                                 |
| other meat                                       | 13          | 0.03                                   | 41.41                                                 |
| veal                                             | 14          | 0.01                                   | 41.42                                                 |
| sheep, goat                                      | 15          | 0.01                                   | 41.43                                                 |

<sup>1/</sup> food groups or products contributed at least 0.1% of vitamin D.

**Table S18.** Food group and product sources of thiamin contribution from meat, meat products, and seafood in the average Polish diet.

| <b>Food Group<br/>Food Product</b> | <b>Rank</b> | <b>% of Thiamin<br/>Contribution</b> | <b>Cumulative % of<br/>Thiamin Contribution</b> |
|------------------------------------|-------------|--------------------------------------|-------------------------------------------------|
| <b>Food Group</b>                  |             |                                      |                                                 |
| meat products                      | 1           | 16.50                                | 16.50                                           |
| red meat                           | 2           | 15.98                                | 32.48                                           |
| poultry                            | 3           | 2.71                                 | 35.19                                           |
| other meat                         | 4           | 1.38                                 | 36.57                                           |
| processed seafood                  | 5           | 0.42                                 | 36.99                                           |
| fishes                             | 6           | 0.35                                 | 37.34                                           |
| shellfish                          | 7           | 0.01                                 | 37.35                                           |
| <b>Food Product</b>                |             |                                      |                                                 |
| pork                               | 1           | 15.78                                | 15.78                                           |
| processed red meat products        | 2           | 14.73                                | 30.51                                           |
| chicken                            | 3           | 2.44                                 | 32.95                                           |
| other meat products                | 4           | 1.37                                 | 34.31                                           |
| liver, organ meat                  | 5           | 0.92                                 | 35.24                                           |
| minced meat                        | 6           | 0.44                                 | 35.67                                           |
| processed poultry products         | 7           | 0.40                                 | 36.08                                           |
| fresh, chilled or frozen fish      | 8           | 0.35                                 | 36.43                                           |
| poultry excluding chicken          | 9           | 0.27                                 | 36.70                                           |
| dried, smoked and salted seafood   | 10          | 0.23                                 | 36.93                                           |
| other fish and shellfish products  | 11          | 0.20                                 | 37.12                                           |
| beef                               | 12          | 0.18                                 | 37.30                                           |
| veal                               | 13          | 0.02                                 | 37.32                                           |
| other meat                         | 14          | 0.02                                 | 37.34                                           |
| fresh, chilled or frozen shellfish | 15          | 0.01                                 | 37.35                                           |

<sup>1/</sup> food groups or products contributed at least 0.1% of thiamin.

**Table S19.** Food group and product sources of riboflavin contribution from meat, meat products, and seafood in the average Polish diet.

| <b>Food Group<br/>Food Product</b> | <b>Rank</b> | <b>% of Riboflavin<br/>Contribution</b> | <b>Cumulative % of<br/>Riboflavin<br/>Contribution</b> |
|------------------------------------|-------------|-----------------------------------------|--------------------------------------------------------|
| <b>Food Group</b>                  |             |                                         |                                                        |
| meat products                      | 1           | 8.89                                    | 8.89                                                   |
| red meat                           | 2           | 5.47                                    | 14.36                                                  |
| poultry                            | 3           | 4.99                                    | 19.35                                                  |
| other meat                         | 4           | 4.63                                    | 23.98                                                  |
| processed seafood                  | 5           | 0.93                                    | 24.90                                                  |
| fishes                             | 6           | 0.35                                    | 25.25                                                  |
| shellfish                          | 7           | 0.01                                    | 25.27                                                  |
| <b>Food Product</b>                |             |                                         |                                                        |
| processed red meat products        | 1           | 6.59                                    | 6.59                                                   |
| pork                               | 2           | 5.06                                    | 11.66                                                  |
| liver, organ meat                  | 3           | 4.44                                    | 16.10                                                  |
| chicken                            | 4           | 4.33                                    | 20.44                                                  |
| other meat products                | 5           | 1.47                                    | 21.91                                                  |
| processed poultry products         | 6           | 0.82                                    | 22.73                                                  |
| poultry excluding chicken          | 7           | 0.65                                    | 23.39                                                  |
| other fish and shellfish products  | 8           | 0.50                                    | 23.88                                                  |
| dried, smoked and salted seafood   | 9           | 0.43                                    | 24.31                                                  |
| beef                               | 10          | 0.37                                    | 24.68                                                  |
| fresh, chilled or frozen fish      | 11          | 0.35                                    | 25.03                                                  |
| minced meat                        | 12          | 0.16                                    | 25.19                                                  |
| veal                               | 13          | 0.03                                    | 25.22                                                  |
| other meat                         | 14          | 0.03                                    | 25.25                                                  |
| fresh, chilled or frozen shellfish | 15          | 0.01                                    | 25.26                                                  |

<sup>1/</sup> food groups or products contributed at least 0.1% of riboflavin.

**Table S20.** Food group and product sources of niacin contribution from meat, meat products, and seafood in the average Polish diet.

| <b>Food Group<br/>Food Product</b> | <b>Rank</b> | <b>% of Niacin<br/>Contribution</b> | <b>Cumulative % of<br/>Niacin Contribution</b> |
|------------------------------------|-------------|-------------------------------------|------------------------------------------------|
| <b>Food Group</b>                  |             |                                     |                                                |
| meat products                      | 1           | 18.79                               | 18.79                                          |
| red meat                           | 2           | 13.93                               | 32.72                                          |
| poultry                            | 3           | 13.59                               | 46.31                                          |
| other meat                         | 4           | 3.01                                | 49.32                                          |
| processed seafood                  | 5           | 1.97                                | 51.29                                          |
| fishes                             | 6           | 1.02                                | 52.31                                          |
| shellfish                          | 7           | 0.02                                | 52.33                                          |
| <b>Food Product</b>                |             |                                     |                                                |
| processed red meat products        | 1           | 14.41                               | 14.41                                          |
| pork                               | 2           | 12.99                               | 27.40                                          |
| chicken                            | 3           | 11.91                               | 39.31                                          |
| liver, organ meat                  | 4           | 2.48                                | 41.79                                          |
| other meat products                | 5           | 2.28                                | 44.06                                          |
| processed poultry products         | 6           | 2.10                                | 46.16                                          |
| poultry excluding chicken          | 7           | 1.69                                | 47.85                                          |
| other fish and shellfish products  | 8           | 1.16                                | 49.01                                          |
| fresh, chilled or frozen fish      | 9           | 1.02                                | 50.03                                          |
| beef                               | 10          | 0.87                                | 50.89                                          |
| dried, smoked and salted seafood   | 11          | 0.82                                | 51.71                                          |
| minced meat                        | 12          | 0.41                                | 52.12                                          |
| other meat                         | 13          | 0.12                                | 52.24                                          |
| veal                               | 14          | 0.06                                | 52.30                                          |
| fresh, chilled or frozen shellfish | 15          | 0.02                                | 52.32                                          |
| sheep, goat                        | 16          | 0.01                                | 52.33                                          |

**Table S21.** Food group and product sources of vitamin B6 contribution from meat, meat products, and seafood in the average Polish diet.

| <b>Food Group<br/>Food Product</b> | <b>Rank</b> | <b>% of Vitamin<br/>B6 Contribution</b> | <b>Cumulative % of<br/>Vitamin B6<br/>Contribution</b> |
|------------------------------------|-------------|-----------------------------------------|--------------------------------------------------------|
| <b>Food Group</b>                  |             |                                         |                                                        |
| meat products                      | 1           | 10.53                                   | 10.53                                                  |
| poultry                            | 2           | 9.11                                    | 19.65                                                  |
| red meat                           | 3           | 6.42                                    | 26.07                                                  |
| other meat                         | 4           | 1.52                                    | 27.58                                                  |
| processed seafood                  | 5           | 1.17                                    | 28.75                                                  |
| fishes                             | 6           | 0.87                                    | 29.62                                                  |
| shellfish                          | 7           | 0.01                                    | 29.63                                                  |
| <b>Food Product</b>                |             |                                         |                                                        |
| processed red meat products        | 1           | 8.03                                    | 8.03                                                   |
| chicken                            | 2           | 8.02                                    | 16.05                                                  |
| pork                               | 3           | 5.88                                    | 21.93                                                  |
| other meat products                | 4           | 1.27                                    | 23.20                                                  |
| processed poultry products         | 5           | 1.23                                    | 24.44                                                  |
| liver, organ meat                  | 6           | 1.23                                    | 25.67                                                  |
| poultry excluding chicken          | 7           | 1.09                                    | 26.76                                                  |
| fresh, chilled or frozen fish      | 8           | 0.87                                    | 27.63                                                  |
| other fish and shellfish products  | 9           | 0.61                                    | 28.24                                                  |
| dried, smoked and salted seafood   | 10          | 0.56                                    | 28.80                                                  |
| beef                               | 11          | 0.51                                    | 29.31                                                  |
| minced meat                        | 12          | 0.19                                    | 29.50                                                  |
| other meat                         | 13          | 0.09                                    | 29.59                                                  |
| veal                               | 14          | 0.03                                    | 29.62                                                  |
| fresh, chilled or frozen shellfish | 15          | 0.01                                    | 29.63                                                  |

<sup>1/</sup> food groups or products contributed at least 0.1% of vitamin B6.

**Table S22.** Food group and product sources of vitamin B12 contribution from meat, meat products, and seafood in the average Polish diet.

| <b>Food Group<br/>Food Product</b> | <b>Rank</b> | <b>% of Vitamin<br/>B12<br/>Contribution</b> | <b>Cumulative % of<br/>Vitamin B12<br/>Contribution</b> |
|------------------------------------|-------------|----------------------------------------------|---------------------------------------------------------|
| <b>Food Group</b>                  |             |                                              |                                                         |
| other meat                         | 1           | 17.54                                        | 17.54                                                   |
| meat products                      | 2           | 12.27                                        | 29.81                                                   |
| processed seafood                  | 3           | 9.29                                         | 39.10                                                   |
| red meat                           | 4           | 7.43                                         | 46.53                                                   |
| poultry                            | 5           | 5.41                                         | 51.94                                                   |
| fishes                             | 6           | 3.89                                         | 55.83                                                   |
| shellfish                          | 7           | 0.19                                         | 56.02                                                   |
| <b>Food Product</b>                |             |                                              |                                                         |
| liver, organ meat                  | 1           | 16.87                                        | 16.87                                                   |
| processed red meat products        | 2           | 9.20                                         | 26.07                                                   |
| pork                               | 3           | 6.48                                         | 32.55                                                   |
| other fish and shellfish products  | 4           | 5.65                                         | 38.20                                                   |
| chicken                            | 5           | 4.22                                         | 42.43                                                   |
| fresh, chilled or frozen fish      | 6           | 3.89                                         | 46.32                                                   |
| dried, smoked and salted seafood   | 7           | 3.64                                         | 49.95                                                   |
| other meat products                | 8           | 2.24                                         | 52.20                                                   |
| poultry excluding chicken          | 9           | 1.19                                         | 53.39                                                   |
| beef                               | 10          | 0.89                                         | 54.27                                                   |
| processed poultry products         | 11          | 0.83                                         | 55.10                                                   |
| other meat                         | 12          | 0.40                                         | 55.50                                                   |
| minced meat                        | 13          | 0.27                                         | 55.78                                                   |
| fresh, chilled or frozen shellfish | 14          | 0.19                                         | 55.96                                                   |
| veal                               | 15          | 0.05                                         | 56.01                                                   |
| sheep, goat                        | 16          | 0.01                                         | 56.02                                                   |

**Table S23.** Food group and product sources of vitamin E contribution from meat, meat products, and seafood in the average Polish diet.

| <b>Food Group</b><br><b>Food Product</b> | <b>Rank</b> | <b>% of Vitamin E</b><br><b>Contribution</b> | <b>Cumulative % of</b><br><b>Vitamin E Contribution</b> |
|------------------------------------------|-------------|----------------------------------------------|---------------------------------------------------------|
| <b>Food Group</b>                        |             |                                              |                                                         |
| meat products                            | 1           | 3.36                                         | 3.36                                                    |
| poultry                                  | 2           | 1.80                                         | 5.16                                                    |
| red meat                                 | 3           | 1.36                                         | 6.51                                                    |
| processed seafood                        | 4           | 1.32                                         | 7.83                                                    |
| fishes                                   | 5           | 0.40                                         | 8.23                                                    |
| other meat                               | 6           | 0.32                                         | 8.55                                                    |
| shellfish                                | 7           | 0.01                                         | 8.56                                                    |
| <b>Food Product</b>                      |             |                                              |                                                         |
| processed red meat products              | 1           | 2.35                                         | 2.35                                                    |
| chicken                                  | 2           | 1.69                                         | 4.04                                                    |
| pork                                     | 3           | 1.28                                         | 5.32                                                    |
| other fish and shellfish products        | 4           | 0.93                                         | 6.24                                                    |
| other meat products                      | 5           | 0.87                                         | 7.11                                                    |
| dried, smoked and salted seafood         | 6           | 0.40                                         | 7.51                                                    |
| fresh, chilled or frozen fish            | 7           | 0.40                                         | 7.90                                                    |
| liver, organ meat                        | 8           | 0.28                                         | 8.19                                                    |
| processed poultry products               | 9           | 0.14                                         | 8.33                                                    |
| poultry excluding chicken                | 10          | 0.10                                         | 8.43                                                    |
| beef                                     | 11          | 0.07                                         | 8.50                                                    |
| minced meat                              | 12          | 0.03                                         | 8.54                                                    |
| fresh, chilled or frozen shellfish       | 13          | 0.01                                         | 8.55                                                    |
| other meat                               | 14          | 0.01                                         | 8.56                                                    |

<sup>1/</sup> food groups or products contributed at least 0.1% of vitamin E.
